# Supplementary material for: GTAG- and CGTC-tagged palindromic DNA repeats in prokaryotes
Source: PubMed Central journal article supplement (PMC3733652; doi:10.1186/1471-2164-14-522), 2013-07-31

**Additional file 2.** Distance between REPs and flanking ORFs in REP-rich species. Data are presented as in Fig. 6.

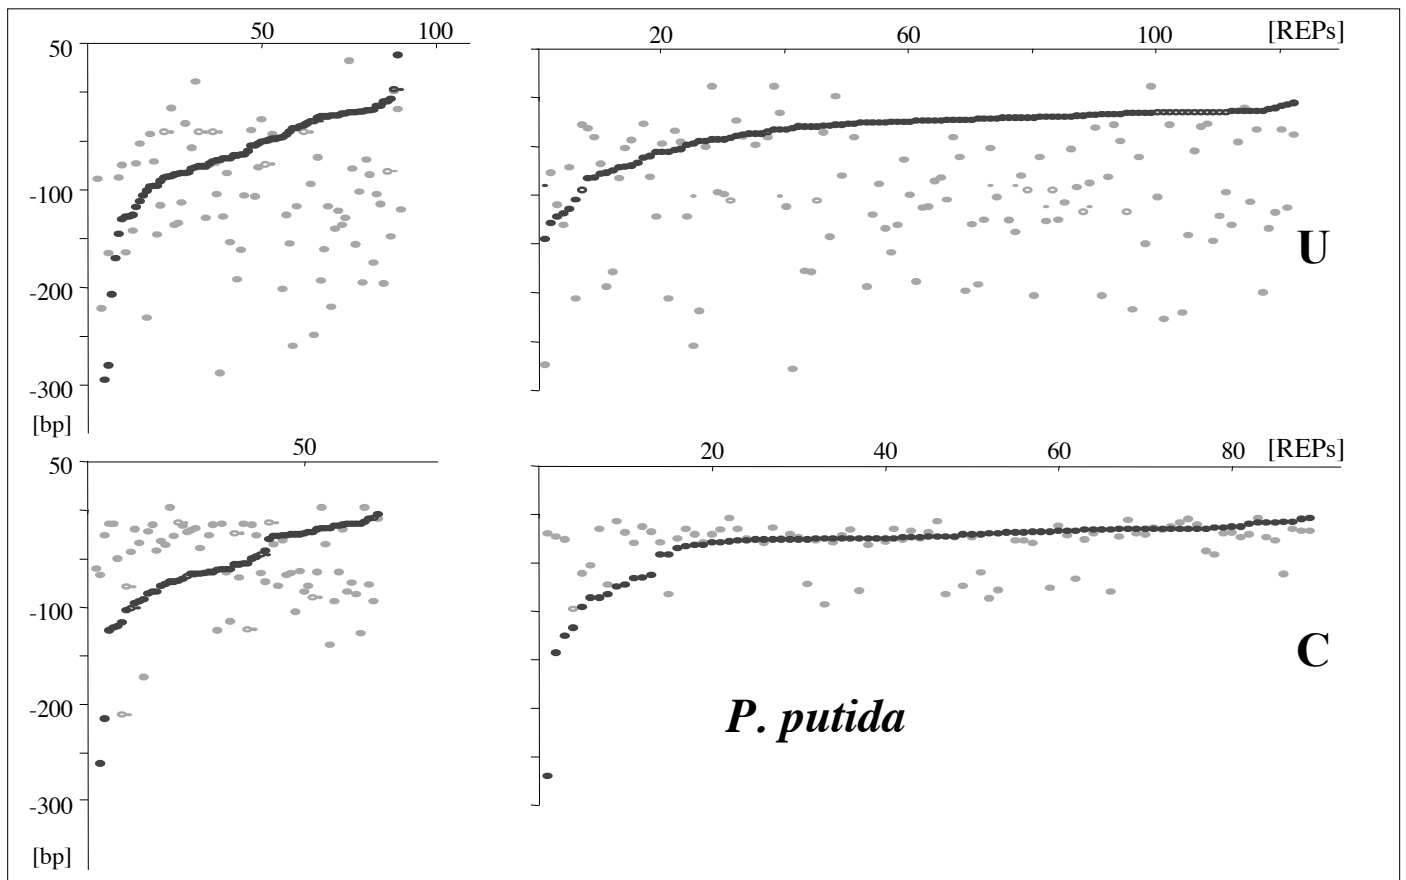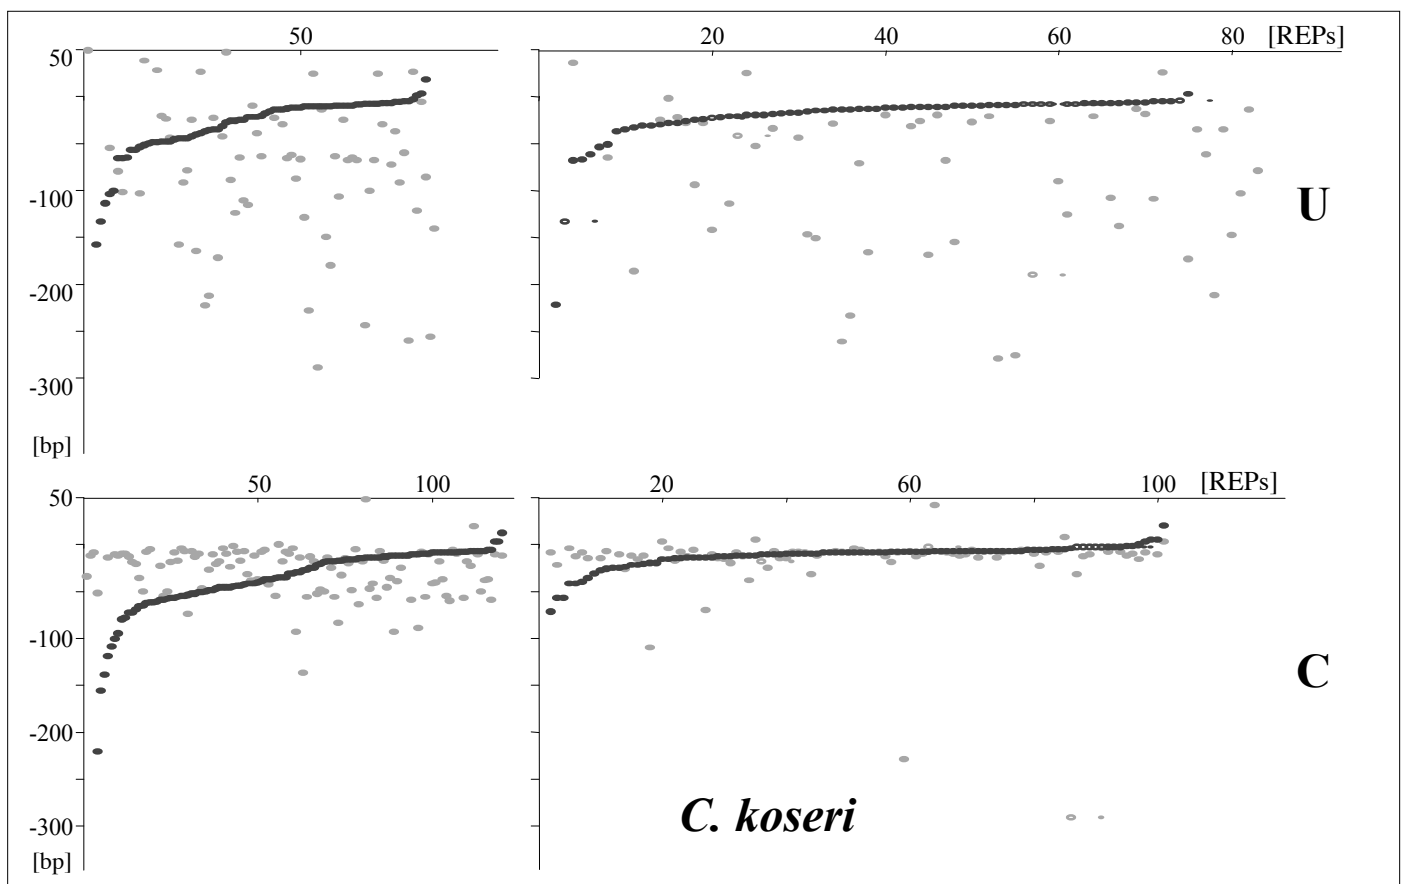

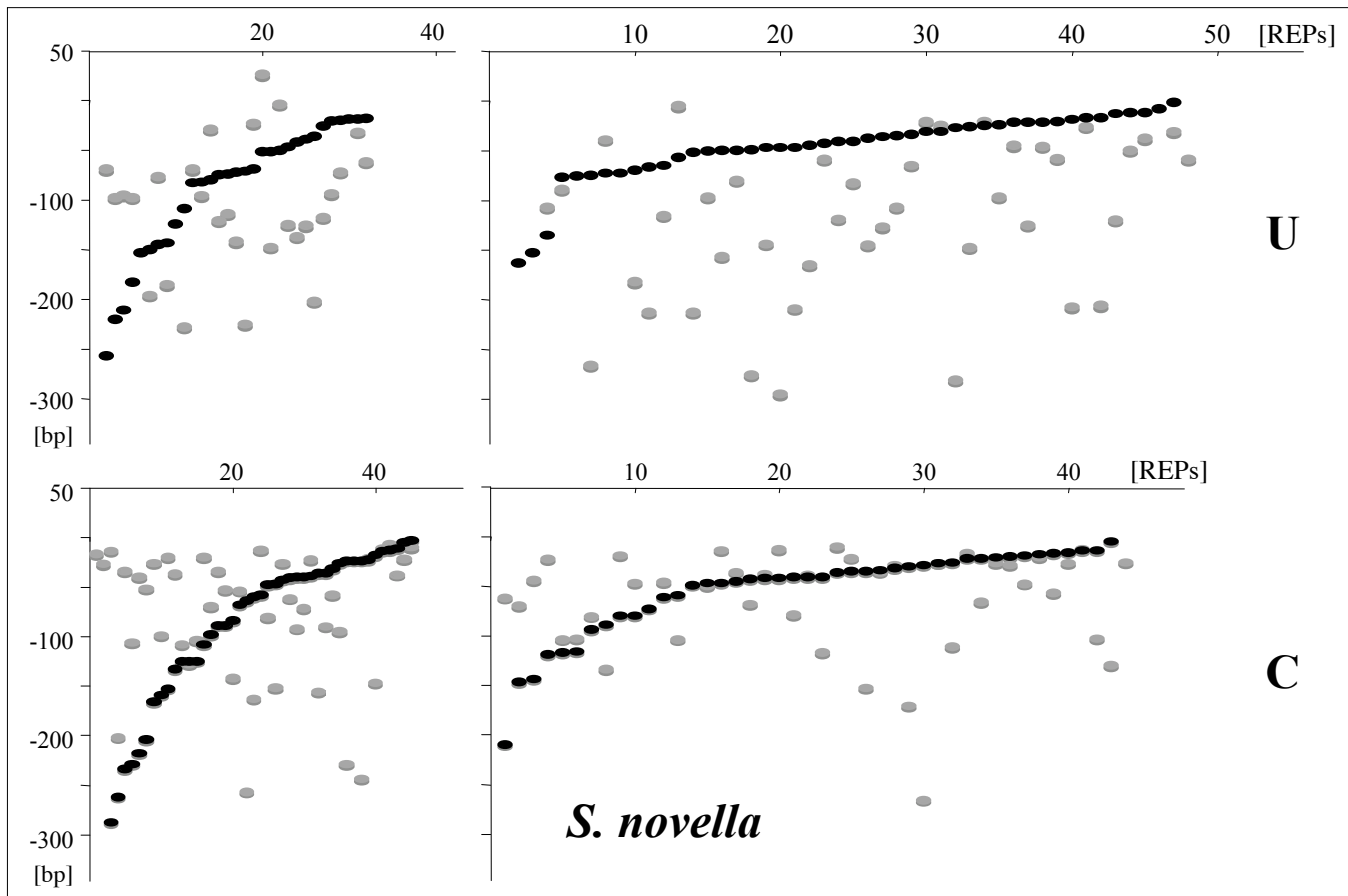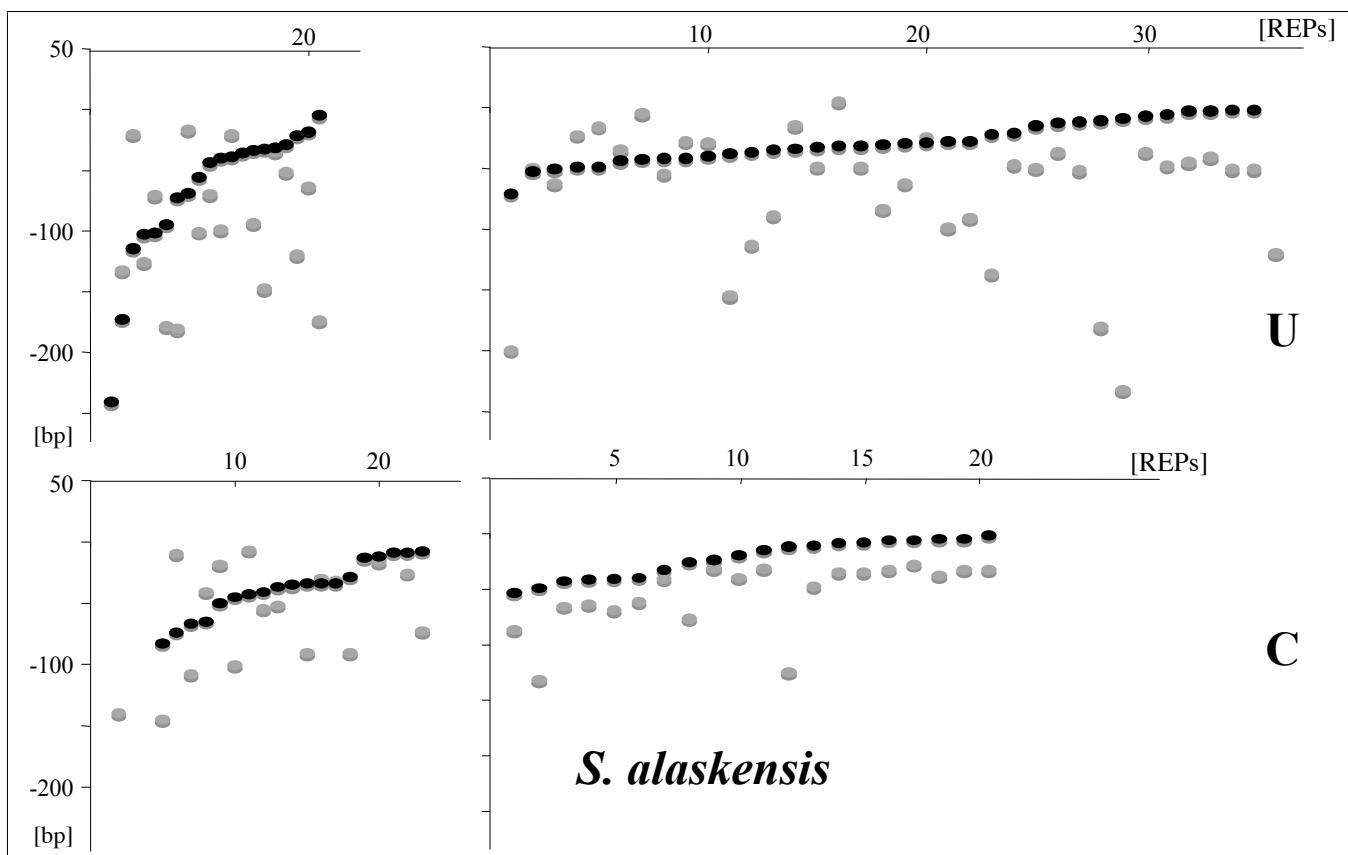

Supplement: 1471-2164-14-522-S2.pdf [file 1471-2164-14-522-S2.pdf]
